# Supplementary material for: Intrauterine growth restriction, defined by an elevated brain-to-liver weight ratio, affects faecal microbiota composition and, to a lesser extent, plasma metabolome profile at different ages in pigs
Source: Springer Nature journal article supplement (doi:10.1186/s42523-024-00358-9), 2025-02-19
Supplement: MOESM1 [file 42523_2024_358_MOESM1_ESM.docx]

**Additional file 1**

**Intrauterine growth restriction, defined by an elevated brain-to-liver weight ratio, affects faecal microbiota composition and, to a lesser extent, plasma metabolome profile at different ages in pigs**

R. Ruggeria, b, G. Beea, F. Correa b, P. Trevisi b, C. Ollagniera

a *Swine Research Unit, Agroscope, Route de la Tioleyre 4, 1725 Posieux, Switzerland*

b *Department of Agricultural and Food Sciences (DISTAL), University of Bologna,* *viale G Fanin 44, 40127 Bologna, Italy*

Authors’ email: [roberta.ruggeri@agroscope.admin.ch](mailto:roberta.ruggeri@agroscope.admin.ch), [giuseppe.bee@agroscope.admin.ch](mailto:giuseppe.bee@agroscope.admin.ch), [paolo.trevisi@unibo.it](mailto:paolo.trevisi@unibo.it), [federico.correa2@unibo.it](mailto:federico.correa2@unibo.it), [catherine.ollagnier@agroscope.admin.ch](mailto:catherine.ollagnier@agroscope.admin.ch)

Corresponding author: Giuseppe Bee

**Supplementary Table 1. Brain-to-liver weight ratio of pigs selected for the analysis.** Brain-to-liver weight ratio (BrW/LW) of pigs affected by intrauterine growth restriction (IUGR) and normal pigs (NORM) that were used to compare the blood metabolome and faecal microbiota at different time points.

|  | Category[[1]](#footnote-2) | | Sex | |
| --- | --- | --- | --- | --- |
| Item[[2]](#footnote-3) | IUGR | NORM | Female | Castrate |
| T1 | 12 | 12 | 15 | 9 |
| BrW/LW | 1.00 | 0.36 | 0.69 | 0.66 |
| T2, T3, T4 | 12 | 12 | 12 | 12 |
| BrW/LW | 1.00 | 0.40 | 0.72 | 0.68 |

**Supplementary Table 2. Sequencing depth.** Individual sample information regarding sequencing depth.

| ID[[3]](#footnote-4) | Sow ID[[4]](#footnote-5) | Parity | Sex | BtW[[5]](#footnote-6) | BrW/LW[[6]](#footnote-7) | Category[[7]](#footnote-8) | Time point[[8]](#footnote-9) | Selected | Depth |
| --- | --- | --- | --- | --- | --- | --- | --- | --- | --- |
| 9205 | 5262-FE4 | 3 | Female | 1.11 | 1.10 | IUGR | 4 | 1 | 28819 |
| 9069 | 7162-FE4 | 1 | Castrate | 1.95 | 0.42 | NORM | 2 | 1 | 26669 |
| 9124 | 5906-FE4 | 2 | Female | 1.61 | 0.41 | NORM | 1 | 1 | 49488 |
| 9092 | 1773-FE4 | 7 | Female | 1.18 | 0.99 | IUGR | 1 | 1 | 32163 |
| 9108 | 5953-FE4 | 2 | Castrate | 2.03 | 0.35 | NORM | 2 | 1 | 25222 |
| 9110 | 5953-FE4 | 2 | Female | 1.89 | 0.32 | NORM | 2 | 1 | 35540 |
| 9166 | 338-FE4 | 9 | Female | 2.16 | 0.38 | NORM | 2 | 1 | 54012 |
| 9266 | 709-FE4 | 8 | Castrate | 1.87 | 0.46 | NORM | 2 | 1 | 30261 |
| 9110 | 5953-FE4 | 2 | Female | 1.89 | 0.32 | NORM | 4 | 1 | 47032 |
| 9143 | 6076-FE4 | 1 | Female | 0.83 | 1.06 | IUGR | 4 | 1 | 29679 |
| 9166 | 338-FE4 | 9 | Female | 2.16 | 0.38 | NORM | 4 | 1 | 38775 |
| 9165 | 338-FE4 | 9 | Female | 2.15 | 0.41 | NORM | 4 | 1 | 41079 |
| 9093 | 1773-FE4 | 7 | Female | 1.08 | 0.94 | IUGR | 1 | 1 | 32841 |
| 9193 | 5262-FE4 | 3 | Castrate | 1.51 | 0.89 | IUGR | 1 | 1 | 31073 |
| 9236 | 7201-FE4 | 1 | Castrate | 1.94 | 0.46 | NORM | 2 | 1 | 31613 |
| 9239 | 7201-FE4 | 1 | Castrate | 1.95 | 0.44 | NORM | 2 | 1 | 29614 |
| 9059 | 3188-FE4 | 5 | Castrate | 1.76 | 0.46 | NORM | 3 | 1 | 28108 |
| 9006 | 7151-FE4 | 1 | Castrate | 1.03 | 1.12 | IUGR | 1 | 1 | 22955 |
| 9007 | 7151-FE4 | 1 | Castrate | 1.07 | 0.41 | NORM | 1 | 1 | 29748 |
| 9108 | 5953-FE4 | 2 | Castrate | 2.03 | 0.35 | NORM | 1 | 1 | 38794 |
| 9165 | 338-FE4 | 9 | Female | 2.15 | 0.41 | NORM | 1 | 1 | 8851 |
| 9236 | 7201-FE4 | 1 | Castrate | 1.94 | 0.46 | NORM | 4 | 1 | 1272 |
| 9239 | 7201-FE4 | 1 | Castrate | 1.95 | 0.44 | NORM | 3 | 1 | 56528 |
| 9059 | 3188-FE4 | 5 | Castrate | 1.76 | 0.46 | NORM | 2 | 1 | 44147 |
| 9048 | 4062-FE4 | 4 | Castrate | 1.57 | 0.40 | NORM | 1 | 1 | 28884 |
| 9282 | 709-FE4 | 8 | Female | 0.97 | 0.88 | IUGR | 2 | 1 | 56314 |
| 9016 | 7151-FE4 | 1 | Female | 0.99 | 0.96 | IUGR | 1 | 1 | 36803 |
| 9110 | 5953-FE4 | 2 | Female | 1.89 | 0.32 | NORM | 1 | 1 | 28746 |
| 9006 | 7151-FE4 | 1 | Castrate | 1.03 | 1.12 | IUGR | 2 | 1 | 45261 |
| 9284 | 3459-FE4 | 5 | Castrate | 1.31 | 0.88 | IUGR | 4 | 1 | 33257 |
| 9085 | 1773-FE4 | 7 | Castrate | 1.15 | 0.98 | IUGR | 2 | 1 | 1238 |
| 9205 | 5262-FE4 | 3 | Female | 1.11 | 1.10 | IUGR | 1 | 1 | 32393 |
| 9236 | 7201-FE4 | 1 | Castrate | 1.94 | 0.46 | NORM | 3 | 1 | 30554 |
| 9112 | 1684-FE4 | 7 | Female | 1.76 | 0.38 | NORM | 2 | 1 | 40088 |
| 9104 | 757-FE4 | 8 | Female | 1.49 | 0.90 | IUGR | 1 | 1 | 34718 |
| 9085 | 1773-FE4 | 7 | Castrate | 1.15 | 0.98 | IUGR | 4 | 1 | 31491 |
| 9205 | 5262-FE4 | 3 | Female | 1.11 | 1.11 | IUGR | 2 | 1 | 45294 |
| 9033 | 7146-FE4 | 1 | Castrate | 1.9 | 0.36 | NORM | 2 | 1 | 19047 |
| 9086 | 1773-FE4 | 7 | Castrate | 1.11 | 1.14 | IUGR | 2 | 1 | 41018 |
| 9006 | 7151-FE4 | 1 | Castrate | 1.03 | 1.12 | IUGR | 3 | 1 | 62877 |
| 9183 | 7202-FE4 | 1 | Castrate | 1.17 | 1.07 | IUGR | 2 | 1 | 40677 |
| 9166 | 338-FE4 | 9 | Female | 2.16 | 0.38 | NORM | 1 | 1 | 27838 |
| 9092 | 1773-FE4 | 7 | Female | 1.18 | 1.00 | IUGR | 2 | 1 | 41374 |
| 9093 | 1773-FE4 | 7 | Female | 1.08 | 0.94 | IUGR | 4 | 1 | 29702 |
| 9108 | 5953-FE4 | 2 | Castrate | 2.03 | 0.35 | NORM | 4 | 1 | 25700 |
| 9122 | 5906-FE4 | 2 | Female | 1.84 | 0.36 | NORM | 3 | 1 | 38052 |
| 9093 | 1773-FE4 | 7 | Female | 1.08 | 0.94 | IUGR | 2 | 1 | 41000 |
| 9013 | 7151-FE4 | 1 | Female | 1.05 | 0.87 | IUGR | 3 | 1 | 40499 |
| 9122 | 5906-FE4 | 2 | Female | 1.84 | 0.36 | NORM | 1 | 1 | 22663 |
| 9108 | 5953-FE4 | 2 | Castrate | 2.03 | 0.35 | NORM | 3 | 1 | 44204 |
| 9121 | 5906-FE4 | 2 | Female | 1.96 | 0.36 | NORM | 1 | 1 | 30670 |
| 9205 | 5262-FE4 | 3 | Female | 1.11 | 1.11 | IUGR | 3 | 1 | 32822 |
| 9122 | 5906-FE4 | 2 | Female | 1.84 | 0.36 | NORM | 2 | 1 | 32933 |
| 9143 | 6076-FE4 | 1 | Female | 0.83 | 1.06 | IUGR | 3 | 1 | 31782 |
| 9092 | 1773-FE4 | 7 | Female | 1.18 | 1.00 | IUGR | 3 | 1 | 41411 |
| 9016 | 7151-FE4 | 1 | Female | 0.99 | 0.96 | IUGR | 4 | 1 | 55016 |
| 9016 | 7151-FE4 | 1 | Female | 0.99 | 0.96 | IUGR | 3 | 1 | 6492 |
| 9016 | 7151-FE4 | 1 | Female | 0.99 | 0.96 | IUGR | 2 | 1 | 60599 |
| 9110 | 5953-FE4 | 2 | Female | 1.89 | 0.32 | NORM | 3 | 1 | 38896 |
| 9013 | 7151-FE4 | 1 | Female | 1.05 | 0.87 | IUGR | 2 | 1 | 57628 |
| 9165 | 338-FE4 | 9 | Female | 2.15 | 0.41 | NORM | 3 | 1 | 50687 |
| 9143 | 6076-FE4 | 1 | Female | 0.83 | 1.06 | IUGR | 2 | 1 | 43745 |
| 9086 | 1773-FE4 | 7 | Castrate | 1.11 | 1.13 | IUGR | 1 | 1 | 53553 |
| 9166 | 338-FE4 | 9 | Female | 2.16 | 0.38 | NORM | 3 | 1 | 69256 |
| 9069 | 7162-FE4 | 1 | Castrate | 1.95 | 0.42 | NORM | 3 | 1 | 23014 |
| 9033 | 7146-FE4 | 1 | Castrate | 1.9 | 0.36 | NORM | 4 | 1 | 44073 |
| 9266 | 709-FE4 | 8 | Castrate | 1.87 | 0.46 | NORM | 3 | 1 | 54524 |
| 9284 | 3459-FE4 | 5 | Castrate | 1.31 | 0.88 | IUGR | 2 | 1 | 47954 |
| 9112 | 1684-FE4 | 7 | Female | 1.76 | 0.38 | NORM | 3 | 1 | 37984 |
| 9282 | 709-FE4 | 8 | Female | 0.97 | 0.88 | IUGR | 1 | 1 | 30306 |
| 9282 | 709-FE4 | 8 | Female | 0.97 | 0.88 | IUGR | 4 | 1 | 42453 |
| 9165 | 338-FE4 | 9 | Female | 2.15 | 0.41 | NORM | 2 | 1 | 63679 |
| 9106 | 757-FE4 | 8 | Female | 1.08 | 0.92 | IUGR | 1 | 1 | 52217 |
| 9069 | 7162-FE4 | 1 | Castrate | 1.95 | 0.42 | NORM | 4 | 1 | 34925 |
| 9059 | 3188-FE4 | 5 | Castrate | 1.76 | 0.46 | NORM | 4 | 1 | 40414 |
| 9006 | 7151-FE4 | 1 | Castrate | 1.03 | 1.12 | IUGR | 4 | 1 | 39642 |
| 9143 | 6076-FE4 | 1 | Female | 0.83 | 1.06 | IUGR | 1 | 1 | 29546 |
| 9183 | 7202-FE4 | 1 | Castrate | 1.17 | 1.07 | IUGR | 3 | 1 | 50258 |
| 9093 | 1773-FE4 | 7 | Female | 1.08 | 0.90 | IUGR | 3 | 1 | 32798 |
| 9239 | 7201-FE4 | 1 | Castrate | 1.95 | 0.43 | NORM | 4 | 1 | 45838 |
| 9112 | 1684-FE4 | 7 | Female | 1.76 | 0.38 | NORM | 1 | 1 | 31543 |
| 9183 | 7202-FE4 | 1 | Castrate | 1.17 | 1.07 | IUGR | 4 | 1 | 39263 |
| 9033 | 7146-FE4 | 1 | Castrate | 1.9 | 0.35 | NORM | 3 | 1 | 43388 |
| 9119 | 5906-FE4 | 2 | Castrate | 1.68 | 0.29 | NORM | 1 | 1 | 27982 |
| 9086 | 1773-FE4 | 7 | Castrate | 1.11 | 1.13 | IUGR | 4 | 1 | 40526 |
| 9013 | 7151-FE4 | 1 | Female | 1.05 | 0.87 | IUGR | 4 | 1 | 22027 |
| 9160 | 338-FE4 | 3 | Castrate | 1.96 | 0.29 | NORM | 1 | 1 | 0 |
| 9183 | 7202-FE4 | 1 | Castrate | 1.17 | 1.07 | IUGR | 1 | 1 | 27679 |
| 9266 | 709-FE4 | 8 | Castrate | 1.87 | 0.46 | NORM | 4 | 1 | 28537 |
| 9085 | 1773-FE4 | 7 | Castrate | 1.15 | 0.97 | IUGR | 3 | 1 | 21369 |
| 9122 | 5906-FE4 | 2 | Female | 1.84 | 0.35 | NORM | 4 | 1 | 26619 |
| 9284 | 3459-FE4 | 5 | Castrate | 1.31 | 0.87 | IUGR | 3 | 1 | 27701 |
| 9086 | 1773-FE4 | 7 | Castrate | 1.11 | 1.13 | IUGR | 3 | 1 | 43488 |
| 9092 | 1773-FE4 | 7 | Female | 1.18 | 0.99 | IUGR | 4 | 1 | 41610 |
| 9112 | 1684-FE4 | 7 | Female | 1.76 | 0.38 | NORM | 4 | 1 | 31182 |
| 9282 | 709-FE4 | 8 | Female | 0.97 | 0.88 | IUGR | 3 | 1 | 2545 |

**Supplementary Table 3. Metabolites analysed at T1.** Metabolites analysed from plasma samples of 24 piglets to compare the blood metabolome profile between piglets affected by intrauterine growth restriction (IUGR = 12) and normal piglets (NORM = 12) at day 16 ± 0.6 (T1).

| Item[[9]](#footnote-10) | Statistical analysis[[10]](#footnote-11) |
| --- | --- |
| 2,3-Butanediol | Not included |
| 2-Aminobutyrate | Included |
| 2-Hydroxybutyrate | Not included |
| 3-Aminoisobutyrate | Included |
| 3-Hydroxybutyrate | Not included |
| 3-Hydroxyisobutyrate | Included |
| 3-Methyl-2-oxovalerate | Not included |
| 3-Methylhistidine | Not included |
| Acetate | Included |
| Acetone | Included |
| Alanine | Included |
| Alpha-ketoisovalerate | Not included |
| Anserine | Not included |
| Arabinose | Included |
| Arginine | Included |
| Ascorbate | Included |
| Asparagine | Included |
| Aspartate | Included |
| Beta-alanine | Included |
| Betaine | Included |
| Carnosine | Not included |
| Choline | Included |
| Citramalate | Included |
| Citrate, glutamine | Included |
| Creatine | Included |
| Dimethylamine | Not included |
| Dimethyl-sulfone | Included |
| Ethanol | Not included |
| Formate | Included |
| Fumarate | Included |
| Glucose | Included |
| Glycerol | Included |
| Glycine | Included |
| Glyoxylate | Included |
| Histidine | Not included |
| Hypoxanthine | Not included |
| Isoleucine | Included |
| Isopropanol | Not included |
| Lactate | Included |
| Leucine | Included |
| Levulinate | Not included |
| Lysine, 2-oxoglutarate | Included |
| Mannose | Included |
| Methanol | Not included |
| Methionine | Included |
| Methylmalonate | Not included |
| Myo-inositol | Included |
| N,N-Dimethylglycine | Included |
| Phenylalanine | Included |
| Proline | Included |
| Pyroglutamate | Not included |
| Pyruvate | Not included |
| Sarcosine | Included |
| Serine | Included |
| Succinate, pyruvate | Included |
| Theophylline | Not included |
| Threonine | Included |
| TMAO (trimethylamine N-oxide) | Included |
| Trans-4-Hydroxy-L-proline | Included |
| Tyrosine | Included |
| UDP-glucose | Not included |
| Uridine | Not included |
| Valine | Included |

**Supplementary Table 4. Metabolites analysed at T2.** Metabolites analysed from plasma samples of 24 piglets to compare the blood metabolome profile between piglets affected by intrauterine growth restriction (IUGR = 12) and normal piglets (NORM = 12) at day 63 ± 8.6 (T2).

| Item[[11]](#footnote-12) | Statistical analysis[[12]](#footnote-13) |
| --- | --- |
| 2,3-Butanediol | Not included |
| 2-Aminobutyrate | Included |
| 2-Hydroxybutyrate | Not included |
| 3-Aminoisobutyrate | Included |
| 3-Hydroxybutyrate | Not included |
| 3-Hydroxyisobutyrate | Included |
| 3-Methyl-2-oxovalerate | Not included |
| 3-Methylhistidine | Not included |
| Acetate | Included |
| Acetone | Included |
| Alanine | Included |
| Alpha-ketoisovalerate | Not included |
| Anserine | Not included |
| Arabinose | Included |
| Arginine | Included |
| Ascorbate | Included |
| Asparagine | Included |
| Aspartate | Included |
| Beta-alanine | Included |
| Betaine | Included |
| Carnosine | Not included |
| Choline | Included |
| Citramalate | Included |
| Citrate, glutamine | Included |
| Creatine | Included |
| Dimethylamine | Not included |
| Dimethyl-sulfone | Included |
| Ethanol | Not included |
| Formate | Included |
| Fumarate | Included |
| Glucose | Included |
| Glycerol | Included |
| Glycine | Included |
| Glyoxylate | Included |
| Histidine | Not included |
| Hypoxanthine | Not included |
| Isoleucine | Included |
| Isopropanol | Not included |
| Lactate | Included |
| Leucine | Included |
| Levulinate | Not included |
| Lysine, 2-oxoglutarate | Included |
| Mannose | Included |
| Methanol | Not included |
| Methionine | Included |
| Methylmalonate | Not included |
| Myo-inositol | Included |
| N,N-Dimethylglycine | Included |
| Phenylalanine | Included |
| Proline | Included |
| Pyroglutamate | Not included |
| Pyruvate | Not included |
| Sarcosine | Included |
| Serine | Included |
| Succinate, pyruvate | Included |
| Theophylline | Not included |
| Threonine | Included |
| TMAO (trimethylamine N-oxide) | Included |
| Trans-4-Hydroxy-L-proline | Included |
| Tyrosine | Included |
| UDP-glucose | Not included |
| Uridine | Not included |
| Valine | Included |


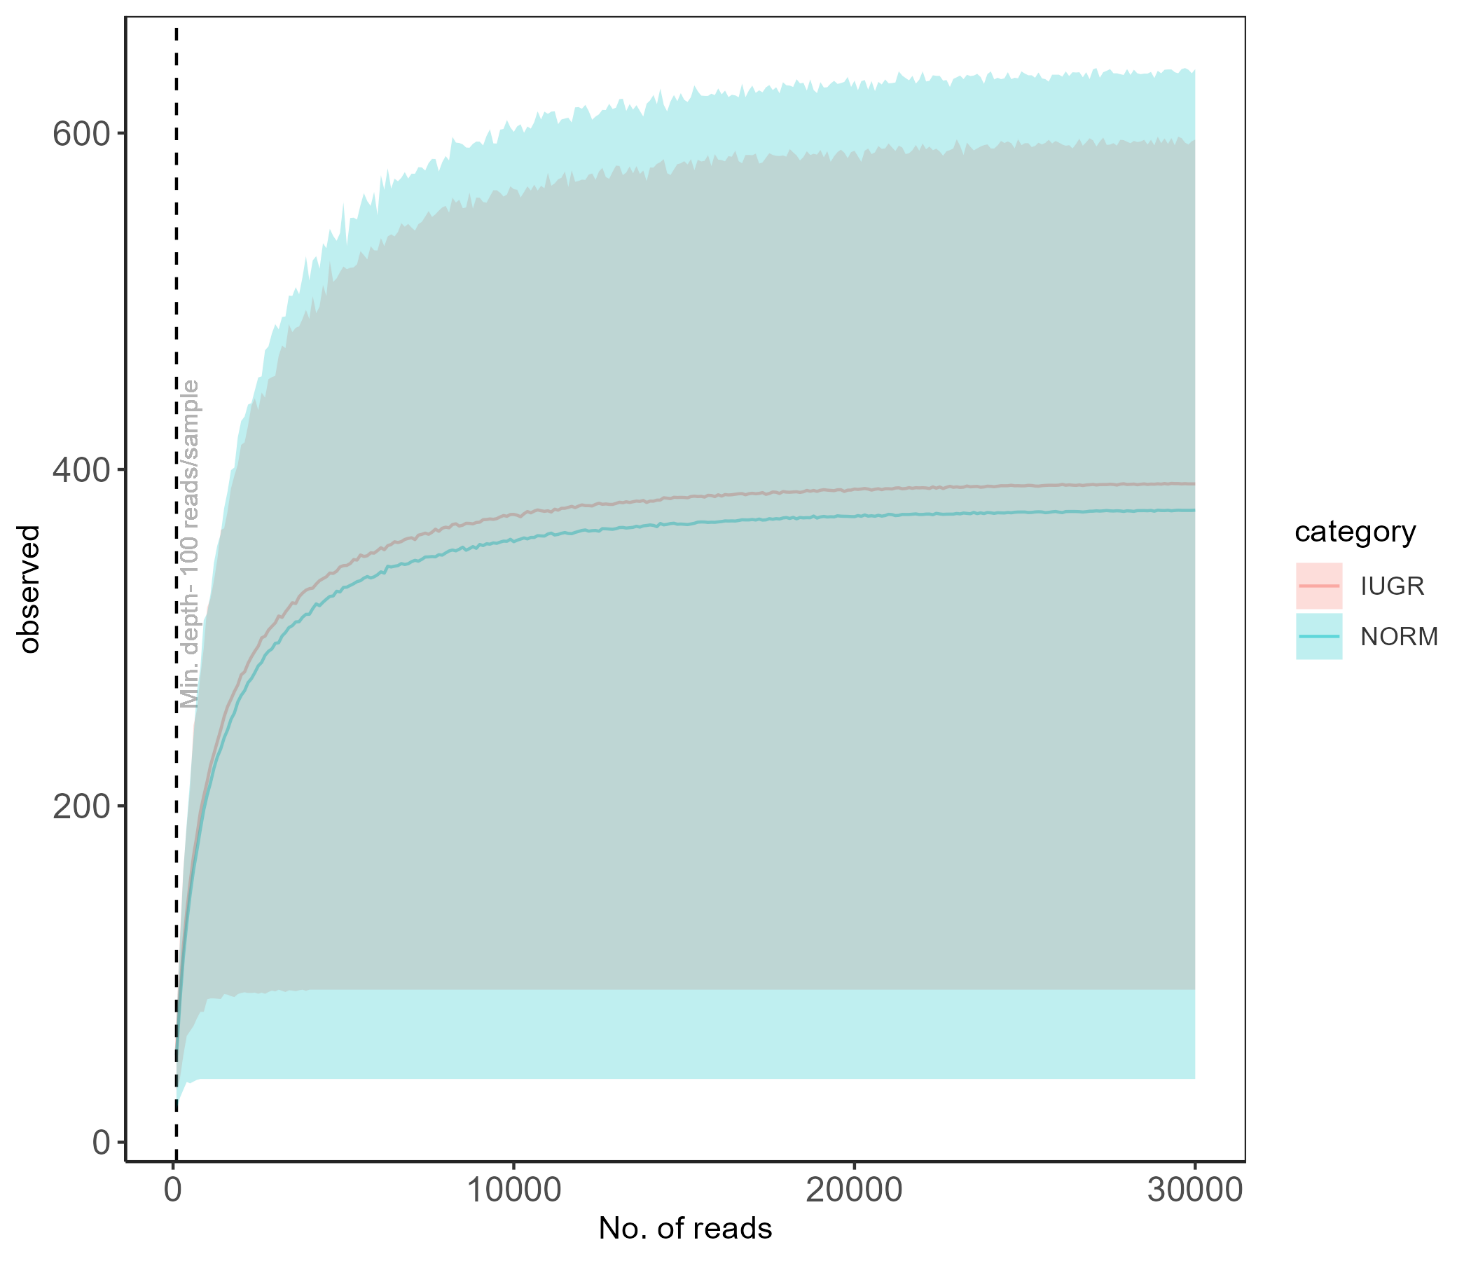


**Supplementary Figure 1. MiSeq sequencing rarefaction curve.** Rarefaction curve of faecal samples of piglets generated through sequencing the V3–V4 region of the 16s rRNA gene with the MiSeq platform (Illumina Inc., San Diego, CA, USA).

1. Category: IUGR: 12 pigs with the highest BrW/LW; NORM: pigs with the lowest BrW/LW. [↑](#footnote-ref-2)
2. T1 = blood and faeces collected before the administration of the pre-/early postweaning diet (day 16 ± 0.6); T2 = blood and faeces collected at the end of the starter period (day 63 ± 8.6); T3 = faeces collected at the beginning of the fattening period (day 119 ± 11.4); T4 = faeces collected at the end of the fattening period (day 162 ± 14.3). BrW/LW = mean BrW/LW in the IUGR and NORM groups. [↑](#footnote-ref-3)
3. ID = identification number of the pig. [↑](#footnote-ref-4)
4. Sow ID = identification number of the sow. [↑](#footnote-ref-5)
5. BtW = birth body weight. [↑](#footnote-ref-6)
6. BrW/LW = brain-to-liver weight ratio. [↑](#footnote-ref-7)
7. IUGR = 12 pigs with the highest BrW/LW; NORM = 12 pigs with the lowest BrW/LW. [↑](#footnote-ref-8)
8. T1 = blood and faeces collected before the administration of the pre-/early postweaning diet (day 16 ± 0.6); T2 = blood and faeces collected at the end of the starter period (day 63 ± 8.6); T3 = faeces collected at the beginning of the fattening period (day 119 ± 11.4); T4 = faeces collected at the end of the fattening period (day 162 ± 14.3). [↑](#footnote-ref-9)
9. Plasma metabolites analysed at day 16 ± 0.6 (T1) from 24 pigs (IUGR = 12, NORM = 12). [↑](#footnote-ref-10)
10. Included: metabolites with plasma concentration in the quantitation range for each sample, included in the statistical analyses; not included: metabolites with plasma concentration not detectable in any (2-hydroxybutyrate, 3-methyl-2-oxovalerate, 3-methylhistidine, alpha-ketoisovalerate, anserine, carnosine, dimethylamine, hypoxanthine, pyroglutamate, and UDP-glucose) or most (2,3 butanediol, 3-hydroxybutyrate, ethanol, histidine, isopropanol, levulinate, methanol, methylmalonate, pyruvate, theophylline, and uridine) of the samples after centrifugation, not included in the statistical analysis. [↑](#footnote-ref-11)
11. Plasma metabolites analysed at day 63 ± 8.6 (T2) from 24 pigs (IUGR = 12, NORM = 12). [↑](#footnote-ref-12)
12. Included: metabolites with plasma concentration in the quantitation range for each sample, included in the statistical analyses; not included: metabolites with plasma concentration not detectable in any (2-hydroxybutyrate, 3-hydroxybutyrate, 3-methyl-2-oxovalerate, anserine, carnosine, hypoxanthine, isopropanol, methanol, pyroglutamate, theophylline, UDP-glucose, and uridine) or most (2,3 butanediol, 3-methylhistidine, alpha-ketoisovalerate, dimethylamine, ethanol, histidine, levulinate, methylmalonate, and pyruvate) of the samples after centrifugation, not included in the statistical analysis. [↑](#footnote-ref-13)
